# Supplementary material
Source: PubMed Central journal article supplement (PMC6741482)
Supplement: jin-0005-0639-s01.pdf [file jin-0005-0639-s01.pdf]

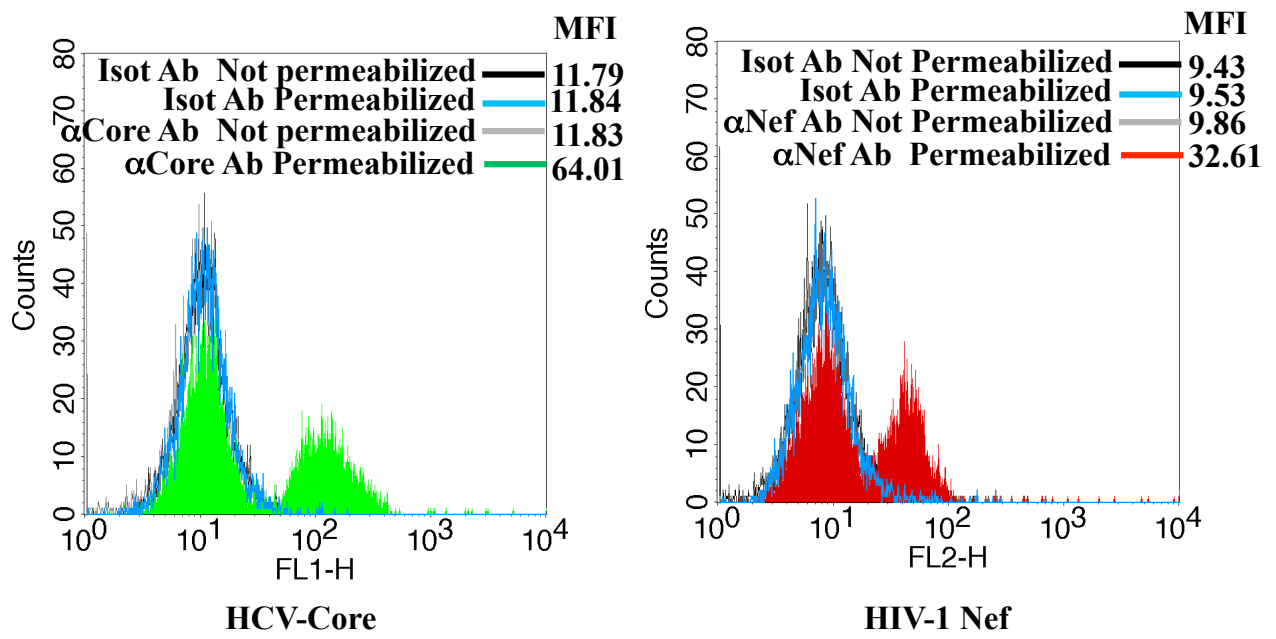

Supplementary Figure 1

HIV-1 Nef 56-206 AA

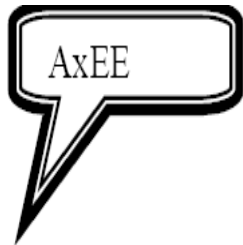

(P/S/A/T)x(Q/E)E

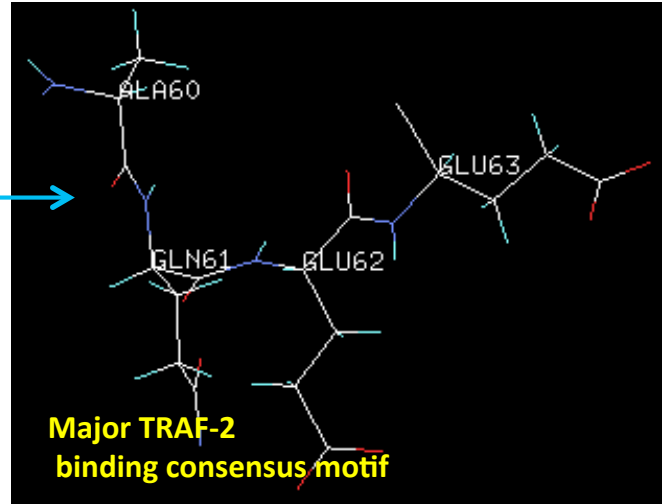

AWLEAQQEEEEVGFPVTPQVPLRPMTYKAAVDLSHFLKEK

GGLEGLIHSQRRQDILDLWIYHTQGYFPDWQNYTPGPGVRYPLTFG

PxxQxxT

WCYKLVFVEPDKIEEANKGENTSLLHPVSLHGMDDPEREVLEWRFD

PxExxD/E/F/W/Y

RLAFHHVARELHPEYFKNC

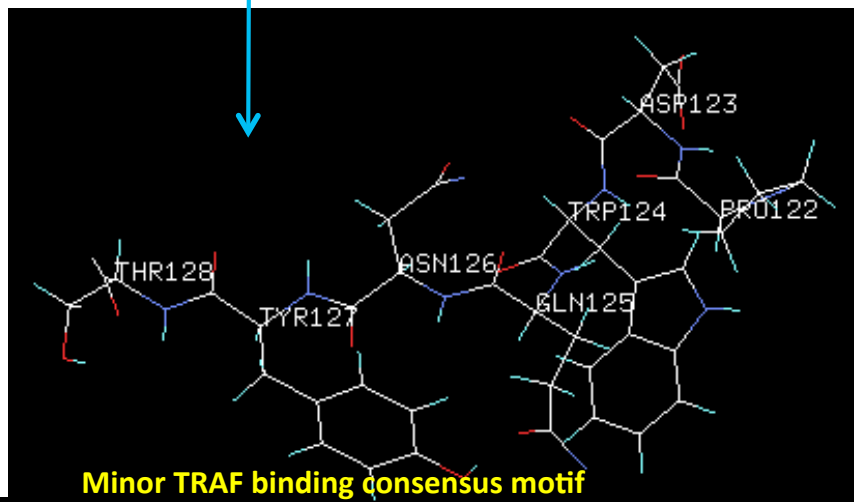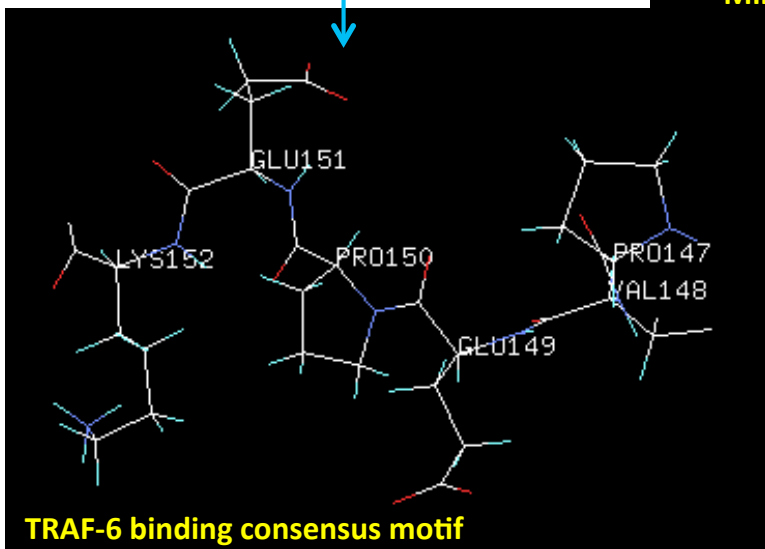

Supplementary Figure 2

Possible TRAF-2 binding consensus motif  
(P/S/A/T)X(Q/E)E

MSTNPKPQRKTKRNTNR **R**P**Q**DVKFPGGGQIVGGVYLLPRRGPRLGVR

ATRKTSEERSQPRGRRQPIPKARRPEGRTWAQPGYPWPLYGNEGCGWAG

WLLSPRGSRPSWG **P**T**D**PR**R**RSRNLGKVIDTLTCGFADLMGYIPLVGA

Possible minor TRAF binding  
consensus motif (PxDxxR)

PLGGAARALAHGVRVLEDGVNYATGNLPGCSFSIFLLALLSCLTVPAS

A

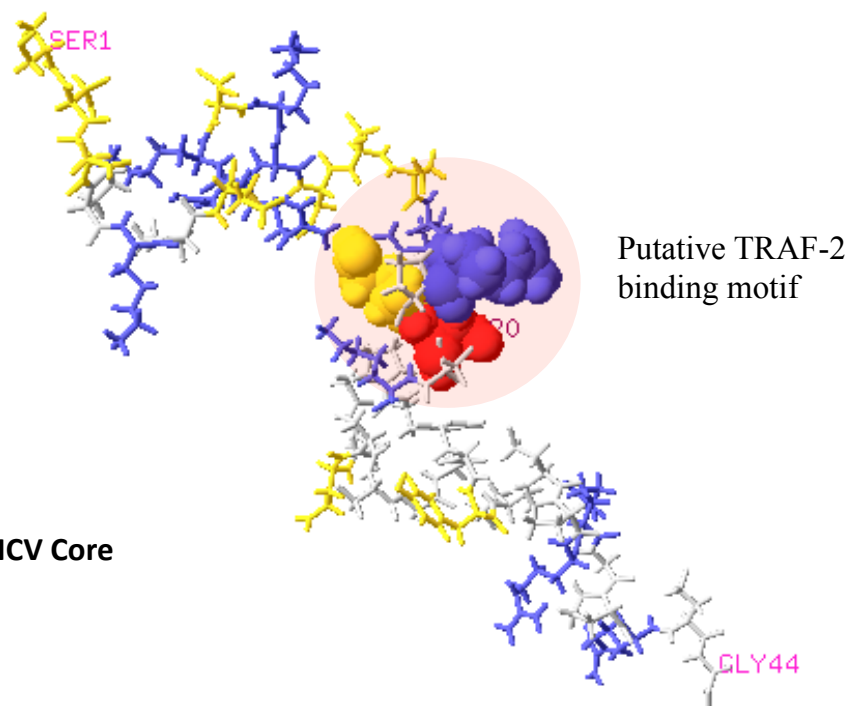

Supplementary Figure 3

**Supplementary Figure 1. Detection of intracellular Nef and Core proteins by flow cytometric analysis following *in vitro* treatment of MDMs with rNef and rCore.**

Following treatment of MDMs with rNef (100 ng/ml) and rCore (100 ng/ml) for 30 min, cells were fixed. MDMs were then permeabilized or not for the detection of total and cell surface expression of Nef and Core proteins, respectively. The detection of Nef and Core proteins was performed by flow cytometry. Results are representative of two independent experiments.

**Supplementary Figure 2. TRAF binding motifs in HIV-1 Nef.** In addition to the acidic cluster domain of HIV-1 Nef involved in binding to TRAF2 (AxEE), a minor TRAF-binding consensus sequence (PxxQxxT) which could bind TRAF5 and a TRAF-6-binding consensus sequence (PxExxD/E/F/W/Y) are present in the C-terminal region of HIV-1 Nef.

**Supplementary Figure 3. Presence of possible TRAF2 and TRAF5 consensus binding motifs in the N-terminal region of HCV Core (aa 1-126).** A possible TRAF2-binding motif (P/S/A/T)X(Q/E)E and a possible minor TRAF-binding consensus sequence (PxDxxR) which could bind TRAF5 are present in the N-terminal region of HCV Core (aa 1-126). We also represented the putative TRAF2-binding motif in the HCV Core N-terminal region.
